# Supplementary material for: Collaborative multi-interface engineering and dynamic iron exchange boost robust bifunctional water electrolysis at 2 A cm−2
Source: Royal Society of Chemistry journal article supplement (doi:10.1039/d4ee04619f), 2024-12-06
Supplement: d4ee04619f1.pdf [file d4ee04619f1.pdf]

## Supplementary Information

### Collaborative multi-interface engineering and dynamic iron exchange boost robust bifunctional water electrolysis at 2 A cm<sup>-2</sup>

#### 1. Experimental section

**Synthesis of the NiMoO<sub>4</sub> precursor.** NiMoO<sub>4</sub> precursor was synthesized on Ni foam by a hydrothermal method. 0.04 M Ni(NO<sub>3</sub>)<sub>2</sub>·6H<sub>2</sub>O and 0.01M (NH<sub>4</sub>)<sub>6</sub>Mo<sub>7</sub>O<sub>24</sub>·4H<sub>2</sub>O were dissolved into 40 mL ultrapure water and stirred for 15 min at room temperature, which was then transferred into a 100 mL Teflon-lined autoclave with a piece of nickel foam. After a hydrothermal process at 150 °C for 6 h in drying oven, the as-prepared NiMoO<sub>4</sub> samples were cleaned by ultrapure water and dried in room temperature.

**Synthesis of the Fe/MoNi<sub>4</sub>/MoO<sub>2</sub> nanoarray.** NiMoO<sub>4</sub> precursor was soaked in ferric nitrate ink for a few seconds. After drying at room temperature overnight, the as-prepared samples were placed at the center of the tube furnace, which was then heated to 400 °C with a duration of 2 h under H<sub>2</sub>/Ar atmosphere to obtain the final Fe/MoNi<sub>4</sub>/MoO<sub>2</sub>. After that, the as-prepared samples were cooled down to room temperature and passivated overnight under Ar atmosphere.

**Synthesis of the MoNi<sub>4</sub>/MoO<sub>2</sub> and Ar-NiMoO<sub>4</sub> samples.** NiMoO<sub>4</sub> precursor was directly treated in Ar or H<sub>2</sub>/Ar (8:92) atmosphere using the same conditions to obtain Ar-NiMoO<sub>4</sub> and MoNi<sub>4</sub>/MoO<sub>2</sub> samples, respectively.

**Synthesis of FeMo/MoO<sub>2</sub>.** FeMo/MoO<sub>2</sub> was prepared following the same procedure for

MoNi<sub>4</sub>/MoO<sub>2</sub> by changing Ni(NO<sub>3</sub>)<sub>2</sub>·6H<sub>2</sub>O into Fe(NO<sub>3</sub>)<sub>3</sub>·9H<sub>2</sub>O during the hydrothermal treatment.

**Synthesis of MoO<sub>2</sub>.** MoO<sub>2</sub> was prepared following the same procedure for MoNi<sub>4</sub>/MoO<sub>2</sub> with the absence of Ni(NO<sub>3</sub>)<sub>2</sub>·6H<sub>2</sub>O.

**Electrochemical measurements.** All the electrochemical measurements were performed in 100 mL 1 M KOH (pH = 14) or 100 mL 1M PBS (pH ≈ 6.5) solutions at room temperature based on the standard three-electrode system. In 1 M KOH, the as-prepared samples were used as working electrode, Hg/HgO electrode and graphite rod were assigned as reference and counter electrodes, respectively. The linear polarization curves were obtained at a scan rate of 2 mV s<sup>-1</sup> by linear sweep voltammetry mode. Before testing, all the catalysts were electrochemically activated by 50 cyclic voltammetry at a scan rate of 50 mV s<sup>-1</sup> with the potentials from 0.05 V to -0.23 V (HER) and 1.124 V to 1.574 V (OER). The EIS spectra were tested at -0.05 V for HER and 1.53 V for OER along with the frequencies varying from 0.1 Hz to 100 kHz. In 1 M PBS, graphite rod and saturated calomel electrode were employed as the counter and reference electrodes, respectively. During all the data measurements, on-the-fly *iR* compensation was automatically performed for all the polarization curves by the workstation system (Gamry Reference 3000 or 600+).<sup>[1]</sup>

**Electrochemical active surface area (ECSA) calculation.** The ECSA can be estimated

on the basis of the follow equation:  $ECSA = \frac{C_{dl}}{C_s}$ , where  $C_s$  is the capacitance per unit area of an electrode with very flat surface, and  $C_{dl}$  is related to the double-layer capacitances of our porous electrodes measured by an electrochemical method.<sup>[2,3]</sup> Here the value of  $C_s = 40 \mu\text{F cm}^{-2}$  was selected for ECSA calculation.

**Turnover frequency (TOF) calculation.** TOF was calculated according to the

following equation: 
$$\text{TOF} = \frac{j}{N \times n_s \times F}$$
 where  $j$  is the HER current density,  $N$  is the number of electrons transferred per  $\text{H}_2$  molecule ( $N = 2$ ),  $F$  represents the Faraday constant, and  $n_s$  represents the density of total active sites per unit area of electrode material. The number of

active sites for HER was evaluated according to this formula: 
$$n_s = \frac{Q}{2FS}$$
 where  $S$ ,  $F$  and  $Q$  correspond to the geometric area of the electrode materials, Faraday constant and the whole charge of cyclic voltammetry curve collected in 1M PBS electrolyte ( $\text{pH} \approx 6.5$ ).

***In-situ* Raman measurements.** The Raman spectra were recorded under a 532 nm laser (Horiba JY HR Evolution). A typical three-electrode configuration (Beijing Scistar Technology Co. Ltd) was designed for in-situ Raman measurements, in which the self-supported catalyst, AgCl/Ag and Pt wire were served as the working, reference and counter electrodes, respectively. The potential was controlled by an electrochemical workstation, as described previously, with applied potentials ranging from 1.12 to 1.72 V. Before collecting the Raman spectra at each potential, chronoamperometric tests were conducted on the OER catalysts for five minutes.

***In-situ* XPS measurements.** The X-ray photoelectron (XPS) spectra were tested by a XPS spectroscopy (Thermo Fisher Scientific-Escalab 250Xi) with an analyzer pass energy of 30 eV and a dwell time of 50 ms. The chamber pressure was remained below  $4.3 \times 10^{-7}$  during the tests. For the in-situ XPS tests, a self-assembly three-electrode setup (working, reference and counter electrodes) was employed for OER testing, in which the OER catalyst, Hg/HgO electrode and Pt wire were served as working, reference and counter electrodes, respectively. The samples were tested at different anodic potentials ranging from 1.12 to 1.72 V for 30 min

in a glovebox continuously purged by N<sub>2</sub> gas (Suzhou Vigor Technologies Co., Ltd.). Following the OER tests, the samples were dried and transferred to the XPS spectrometer under N<sub>2</sub> atmosphere.

**Fine structure characterization.** Fe K-edge X-ray absorption spectra (XAS) were recorded in a transmission mode at the 1W1B and 1W2B beamlines of the Beijing Synchrotron Radiation Facility in China.

**Computational method.** Spin-polarized density functional theory (DFT) calculations were performed with the Vienna Ab Initio Simulation Package (VASP 5.3.5).<sup>[4]</sup> In our calculations, we adopted the Perdew-Burke-Ernzerhof (PBE) functional to consider exchange and correlation effects.<sup>[5]</sup> A cutoff energy of 400 eV was used for the plane-wave basis. The Gaussian smearing method with a smearing width of 0.03 eV was used to determine partial occupancies. DFT-D3 method was used to take into account the VdW interactions.<sup>[6]</sup>

Our calculated lattice constants of bulk MoNi<sub>4</sub> are  $a=5.64$  Å and  $c=3.53$  Å. For bulk MoO<sub>2</sub>, the optimized lattice constants are  $a=4.92$  Å and  $c=2.75$  Å. The calculated bulk structures were used to construct surface models. A  $2 \times 2$  unit cell of MoNi<sub>4</sub> (200) with eight atomic layers was considered in our calculations. Here, the top four atomic layers were relaxed, and the bottom four layers were frozen. For comparison, the MoO<sub>2</sub> (110) surface was constructed with also six atomic layers. Here, we optimized the top three atomic layers and fixed the bottom three layers. In this work, the interfaces of Fe/MoNi<sub>4</sub> (200) and Fe/MoO<sub>2</sub> (110) models were modelled by Fe<sub>4</sub> cluster placed on MoNi<sub>4</sub> (200) and MoO<sub>2</sub> (110) surfaces. The size of MoNi<sub>4</sub> (200) and Fe/MoNi<sub>4</sub> (200) unit cells both were  $11.37$  Å  $\times$   $10.78$  Å  $\times$   $20.11$  Å. For the MoO<sub>2</sub> (110) and Fe/MoO<sub>2</sub> (110), we used the unit cell of  $11.00$  Å  $\times$   $13.90$  Å  $\times$



20.46 Å. The atom-layer slab separated by a 15 Å vacuum was considered for all the calculations. All the supercells in our DFT calculations are large enough to avoid interactions between periodic images that would affect the results of the predicted surface catalytic properties involving the small adsorbates. For the Brillouin zone integration, a Monkhorst-Pack k-point mesh of  $3 \times 3 \times 1$  was used. Structure optimization was finished until the residual Hellmann-Feynman forces were smaller than 0.02 eV/Å.

To explore the energy barriers for water dissociation on the catalysts, we calculated the location and total electronic energy of transition states by the climbing-image nudged elastic band (CI-NEB) method.<sup>[7]</sup> A frequency analysis was performed to confirm that each transition state has a single imaginary frequency in the direction of the reaction coordinate. The Gibbs free energies of hydrogen and water at 298.15 K and 1 atm were calculated with

$$G = E_{DFT} + E_{ZPE} - TS \quad (1)$$

Where  $G$  is Gibbs free energy,  $E_{DFT}$  is the electronic total energy from DFT calculation,  $E_{ZPE}$  is the zero-point energy of the calculated system,  $T$  stands for the Kelvin temperature and  $S$  represents the entropy. Free energy of hydrogen and water adsorption were calculated by

$$\Delta G_{ads} = G_{surf+M} - (G_{surf} + G_M) \quad (2)$$

Here,  $G_{surf+M}$  and  $G_{surf}$  are the free energies of atomic hydrogen atom or water adsorbed surface, and the catalytic surface, respectively. For the free energy of atomic hydrogen adsorption,  $G_M$  is half of the free energies of the gas phase hydrogen. For the free energy of molecular water adsorption,  $G_M$  is the free energy of the gas phase water molecule.

## 2. Material characterization and electrochemical analysis

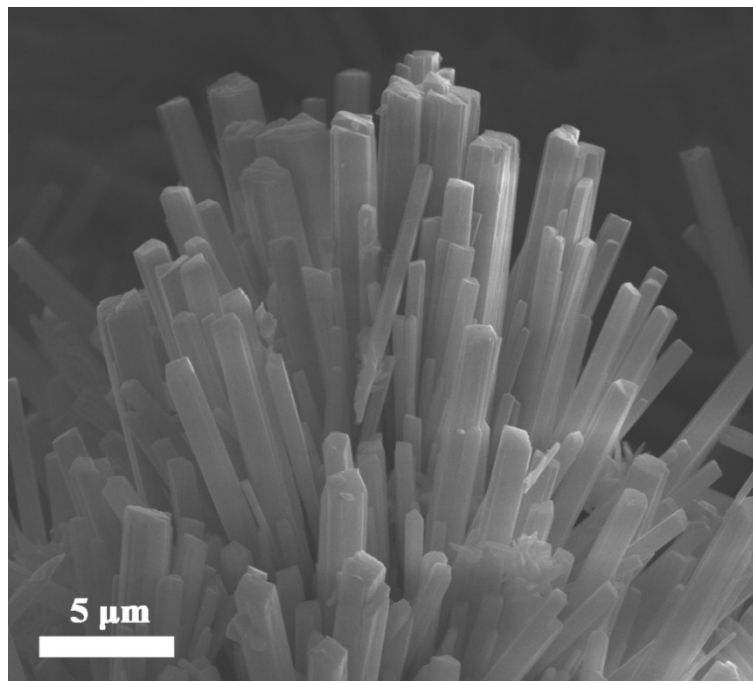

**Supplementary Fig. 1.** SEM image of NiMoO<sub>4</sub> precursor.

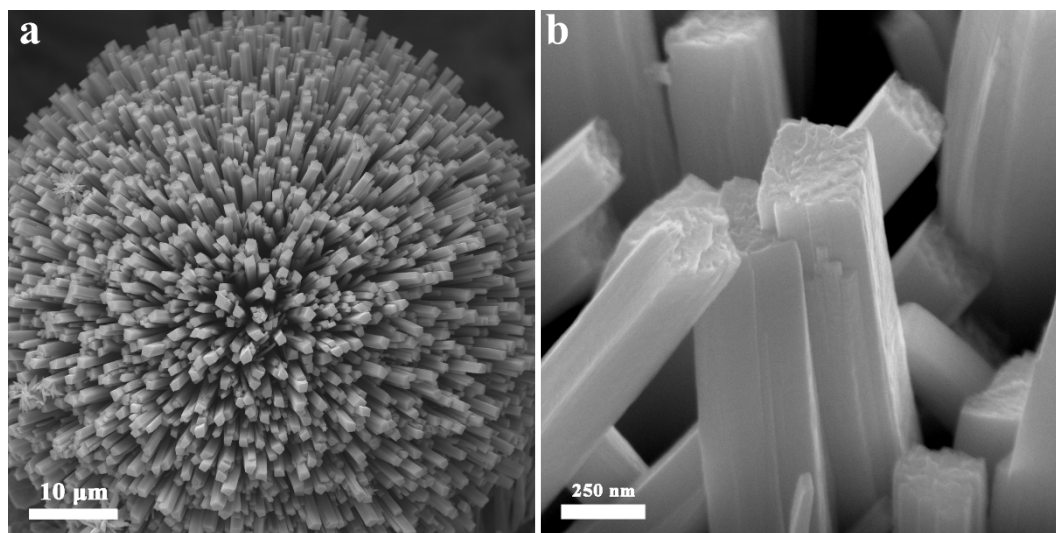

**Supplementary Fig. 2.** SEM images of MoNi<sub>4</sub>/MoO<sub>2</sub> nanoarray.

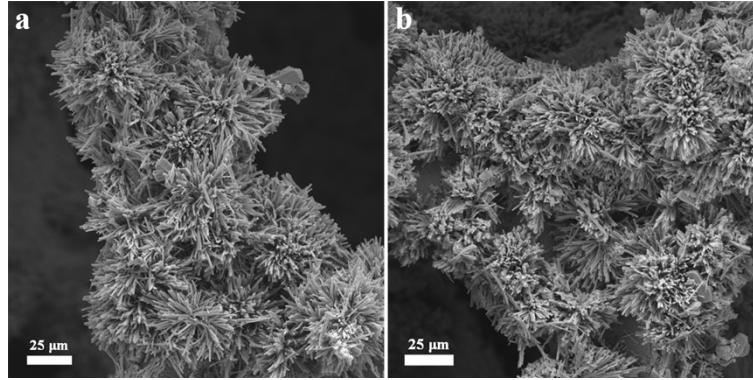

**Supplementary Fig. 3.** SEM images of the as-prepared Fe/MoNi<sub>4</sub>/MoO<sub>2</sub> nanoarray.

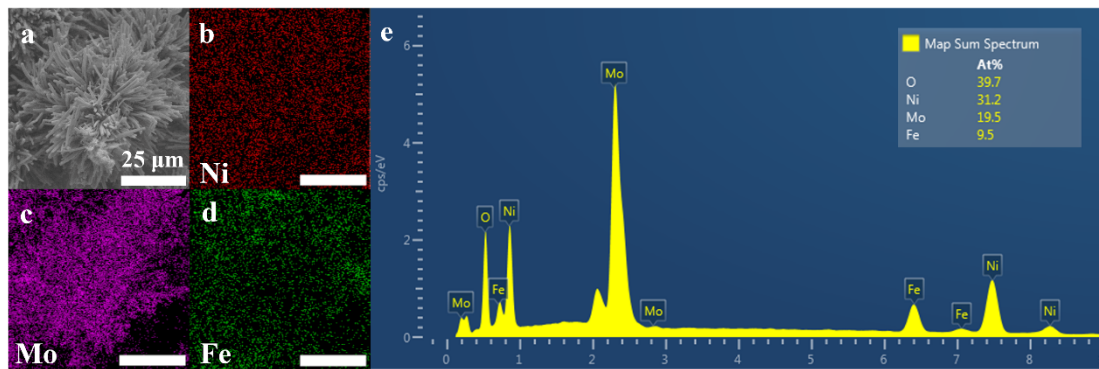

**Supplementary Fig. 4.** (a) SEM image of Fe/MoNi<sub>4</sub>/MoO<sub>2</sub> nanorod and corresponding elemental mapping images of (b) Ni, (c) Mo and (d) Fe. (e) A typical EDX spectrum of Fe/MoNi<sub>4</sub>/MoO<sub>2</sub> nanoarray.

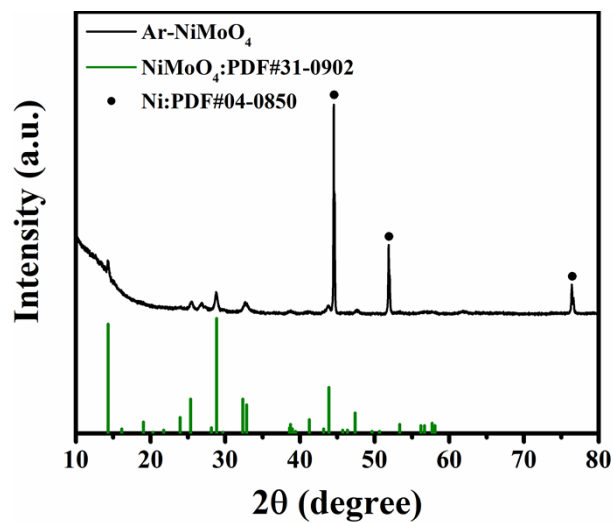

**Supplementary Fig. 5.** A typical XRD pattern of the Ar-NiMoO<sub>4</sub> nanorods on Ni foam.

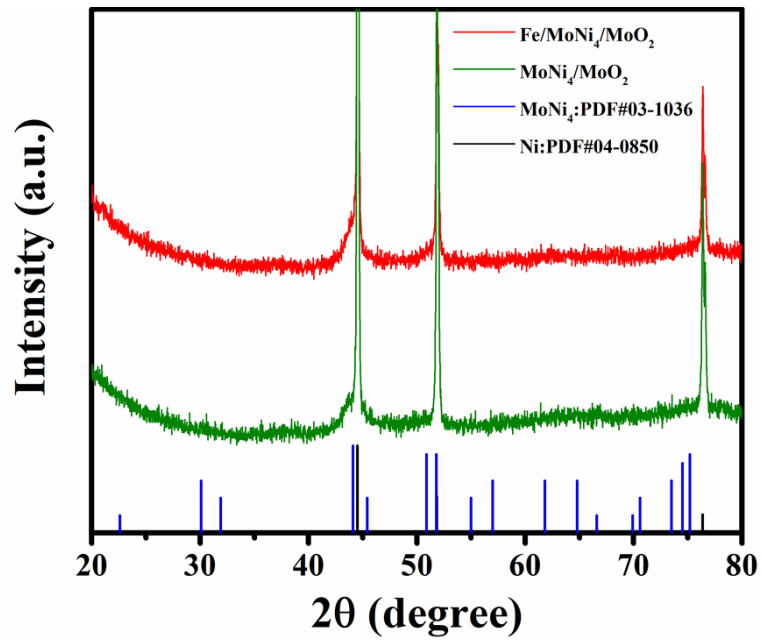

**Supplementary Fig. 6.** XRD spectra of Fe/MoNi<sub>4</sub>/MoO<sub>2</sub> (red line) and MoNi<sub>4</sub>/MoO<sub>2</sub> (green line) nanoarray grown on Ni foam.

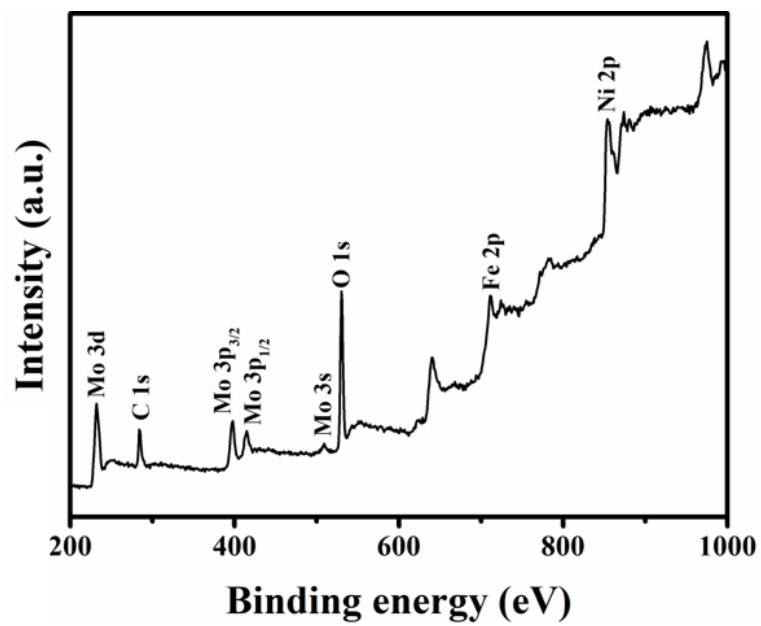

**Supplementary Fig. 7.** The XPS survey spectra of Fe/MoNi<sub>4</sub>/MoO<sub>2</sub> nanoarray.

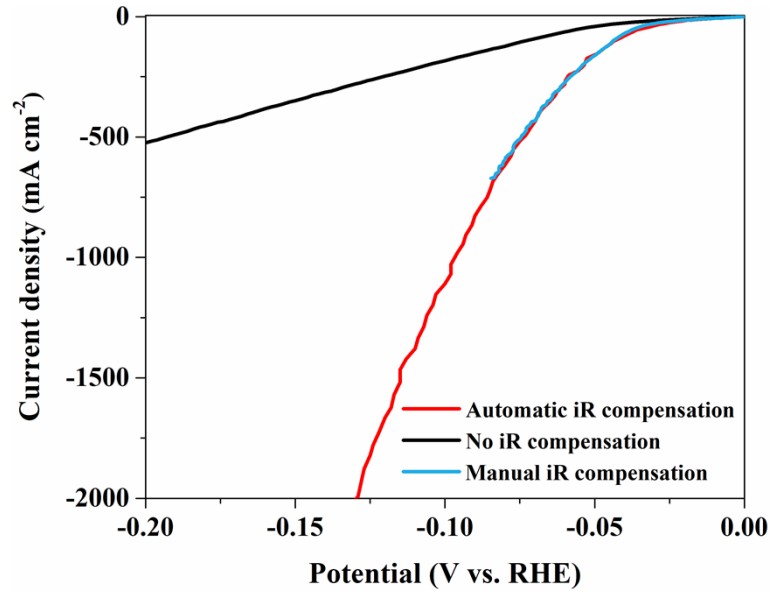

**Supplementary Fig. 8.** The HER polarization curves of Fe/MoNi<sub>4</sub>/MoO<sub>2</sub> with automatic, manual (100%) *iR* compensation or without compensation.

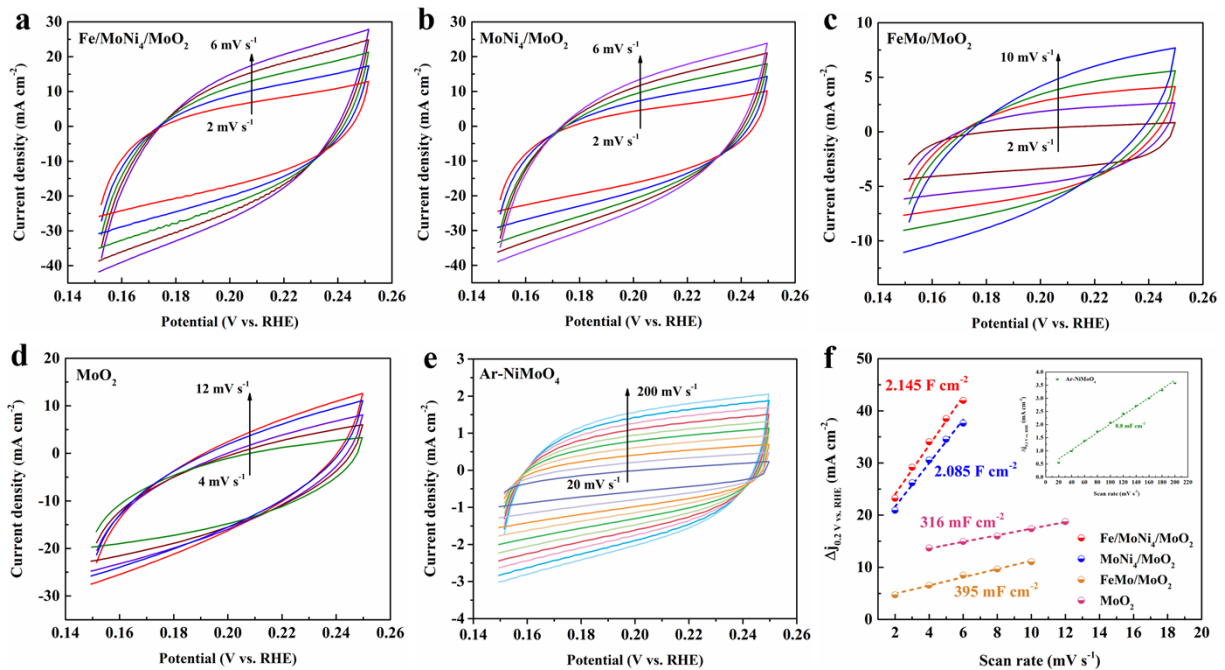

**Supplementary Fig. 9.** Typical cyclic voltammetry curves collected on (a) Fe/MoNi<sub>4</sub>/MoO<sub>2</sub>, (b) MoNi<sub>4</sub>/MoO<sub>2</sub>, (c) FeMo/MoO<sub>2</sub>, (d) MoO<sub>2</sub> and (e) Ar-NiMoO<sub>4</sub> electrodes in 1 M KOH with different scan rates. (f) The double-layer capacitance ( $C_{dl}$ ) of Fe/MoNi<sub>4</sub>/MoO<sub>2</sub>, MoNi<sub>4</sub>/MoO<sub>2</sub>, FeMo/MoO<sub>2</sub>, MoO<sub>2</sub> and Ar-NiMoO<sub>4</sub> electrodes in 1 M KOH.

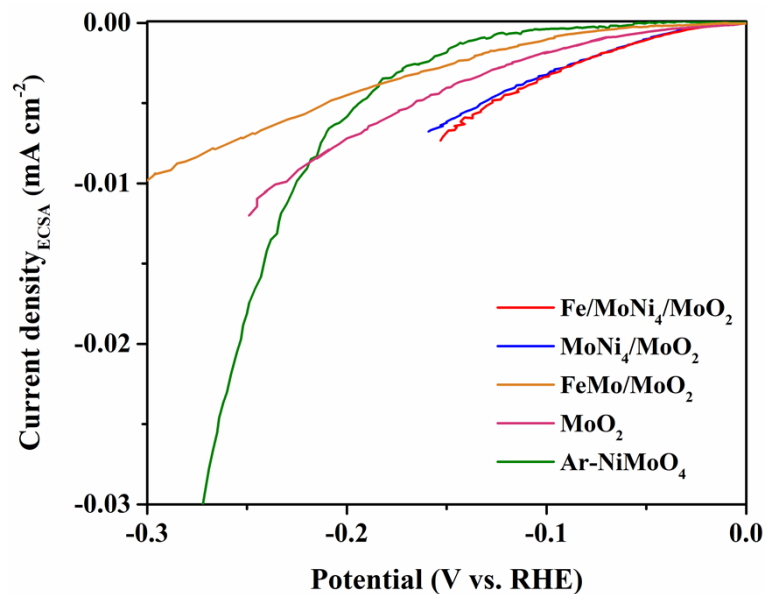

**Supplementary Fig. 10.** The ECSA-normalized HER polarization curves of Fe/MoNi<sub>4</sub>/MoO<sub>2</sub>, MoNi<sub>4</sub>/MoO<sub>2</sub>, FeMo/MoO<sub>2</sub>, MoO<sub>2</sub> and Ar-NiMoO<sub>4</sub> electrodes.

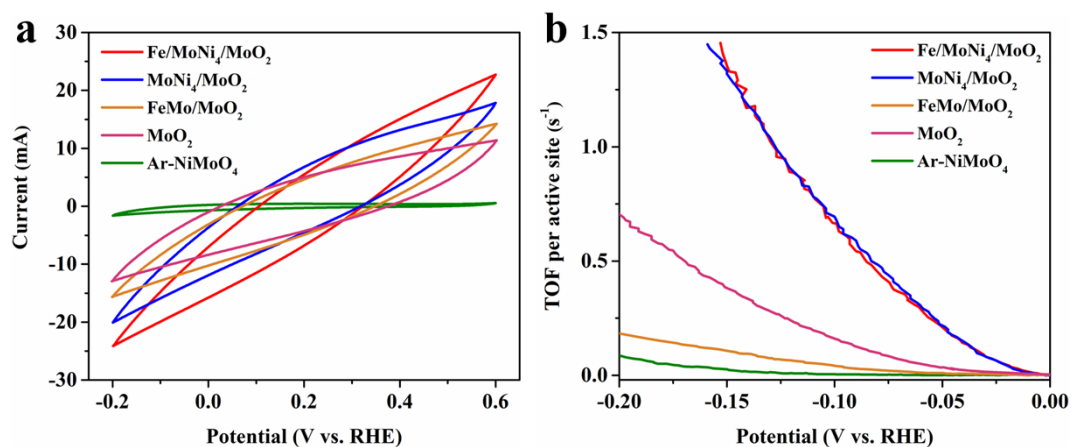

**Supplementary Fig. 11.** (a) The cyclic voltammograms collected on Fe/MoNi<sub>4</sub>/MoO<sub>2</sub>, MoNi<sub>4</sub>/MoO<sub>2</sub>, FeMo/MoO<sub>2</sub>, MoO<sub>2</sub> and Ar-NiMoO<sub>4</sub> electrodes at a scan rate of 50 mV s<sup>-1</sup> in 1 M PBS. (b) The corresponding TOF values of these catalysts for the HER in 1 M KOH.

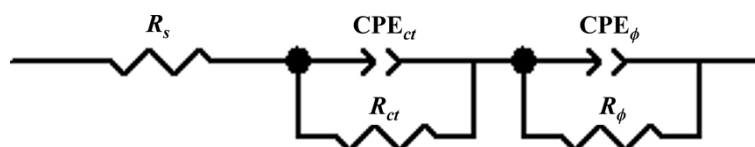

**Supplementary Fig. 12.** The schematic diagram of equivalent circuit.  $R_s$ : series resistance,

$CPE_{ct}$ : charge transfer constant phase element,  $R_{ct}$ : charge transfer resistance,  $CPE_{\phi}$ : ionic intermediate adsorption constant phase element,  $R_{\phi}$ : ionic intermediate adsorption resistance.

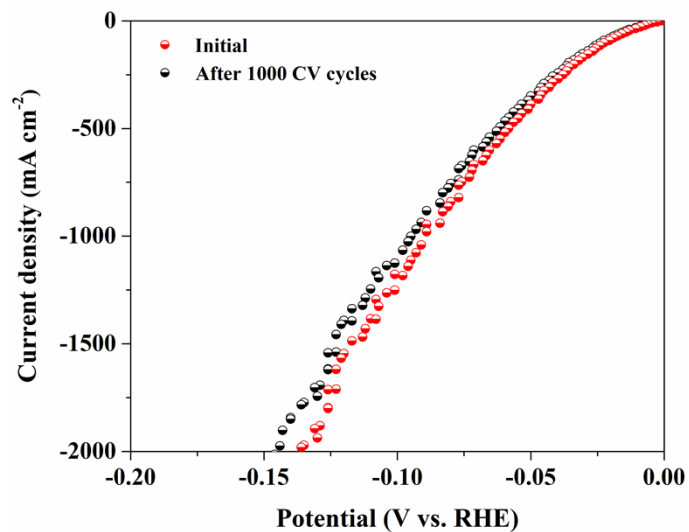

**Supplementary Fig. 13.** Cyclic stability of Fe/MoNi<sub>4</sub>/MoO<sub>2</sub> nanoarray for HER.

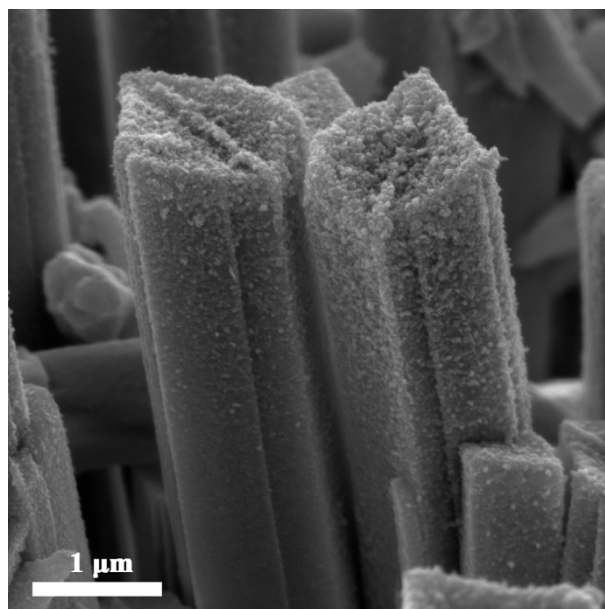

**Supplementary Fig. 14.** The SEM image of post-HER Fe/MoNi<sub>4</sub>/MoO<sub>2</sub> nanoarray.

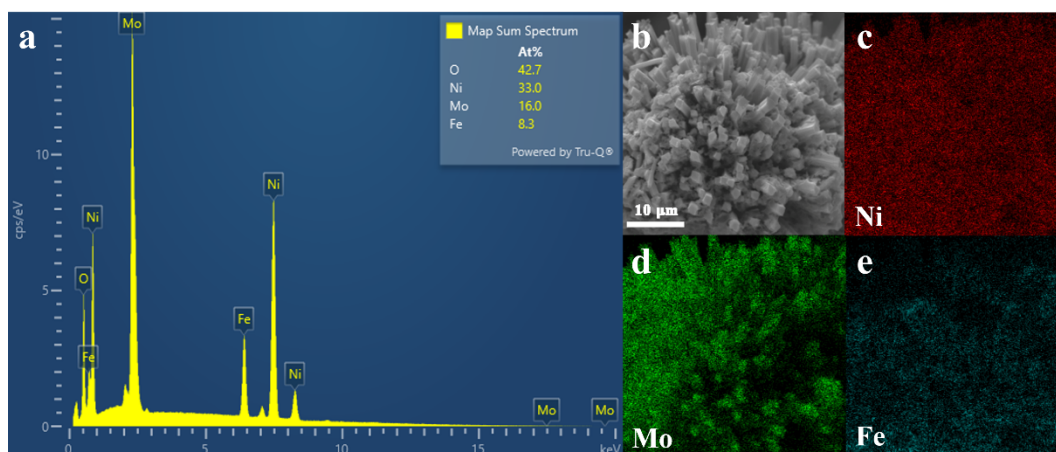

**Supplementary Fig. 15.** (a) A typical EDX spectrum for Fe/MoNi<sub>4</sub>/MoO<sub>2</sub> sample after HER and the atomic ratios of O, Ni, Mo and Fe elements were shown in the inset. (b) SEM image of Fe/MoNi<sub>4</sub>/MoO<sub>2</sub> after HER cycling test and corresponding EDS mapping of (c) Ni, (d) Mo and (e) Fe elements.

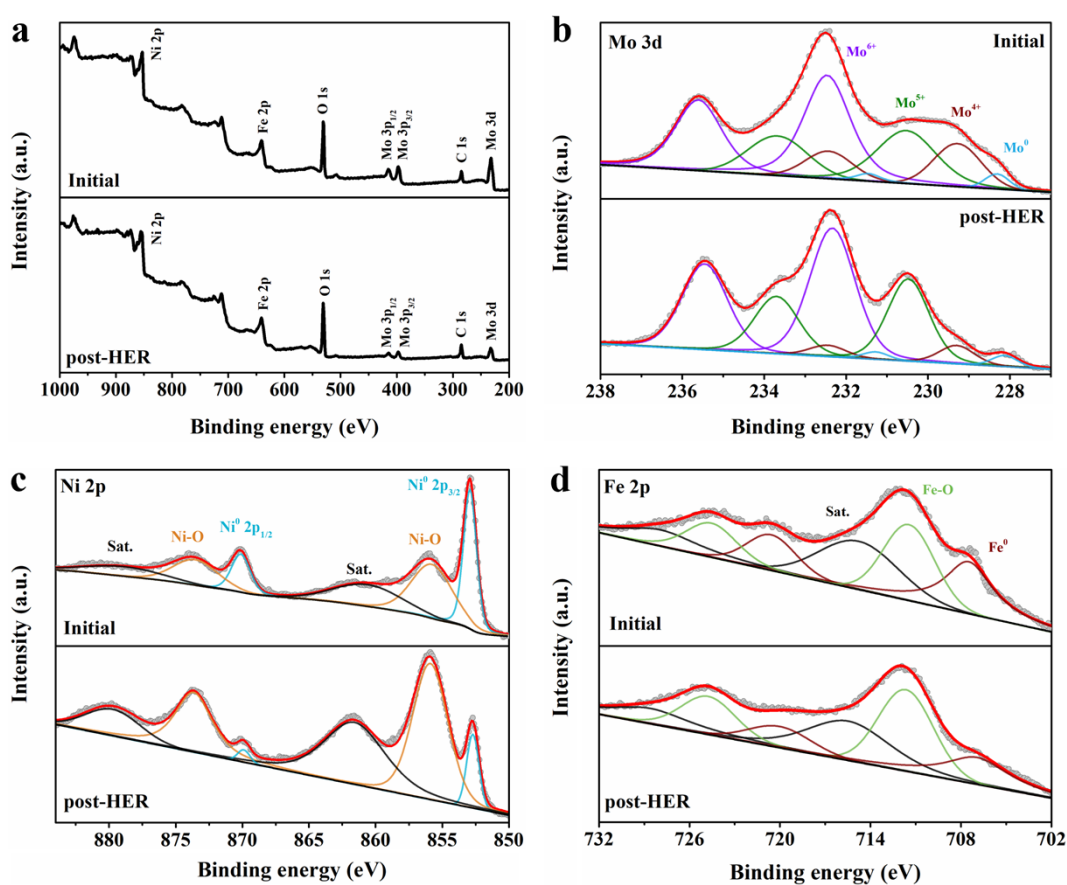

**Supplementary Fig. 16.** (a) The XPS survey and corresponding high-resolution spectra of (b)



Mo 3d, (e) Ni 2p, (d) Fe 2p for original (top) and post-HER Fe/MoNi<sub>4</sub>/MoO<sub>2</sub> (bottom).

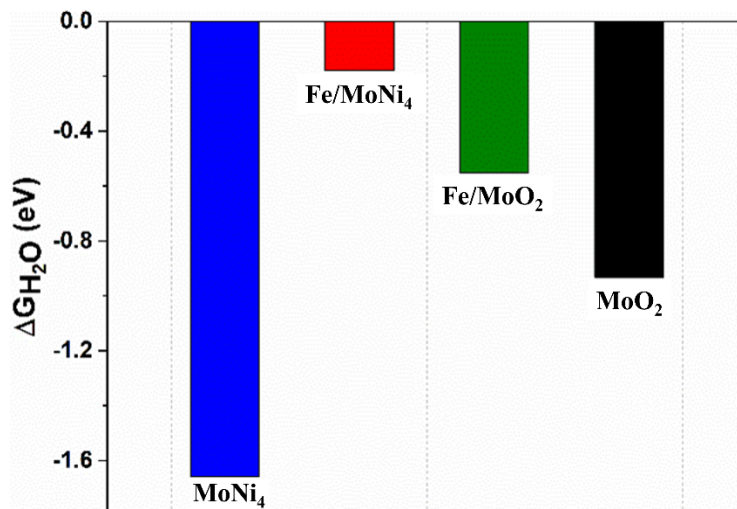

**Supplementary Fig. 17.** Adsorption free energy of water on MoNi<sub>4</sub>, Fe/MoNi<sub>4</sub>, Fe/MoO<sub>2</sub> and MoO<sub>2</sub> catalysts.

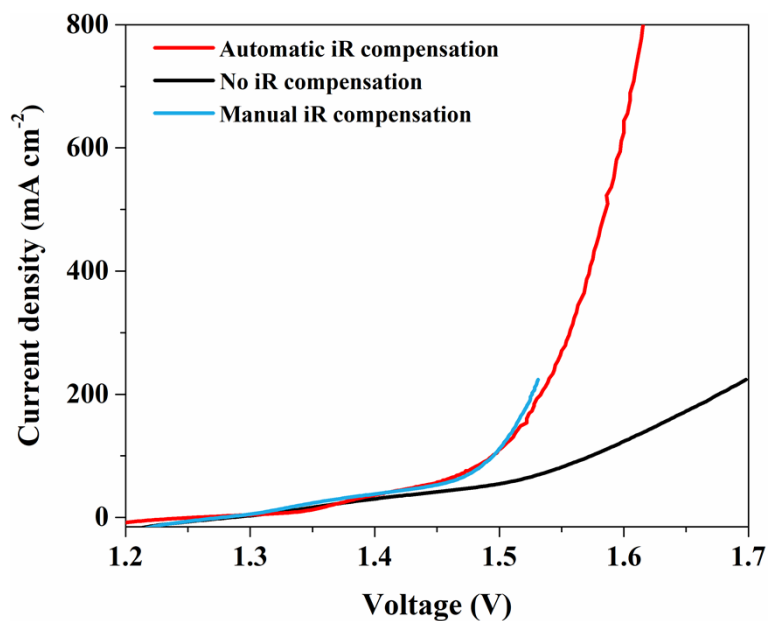

**Supplementary Fig. 18.** The polarization curves of Fe/MoNi<sub>4</sub>/MoO<sub>2</sub> for OER with automatic, manual (100%) *iR* compensation or without compensation.

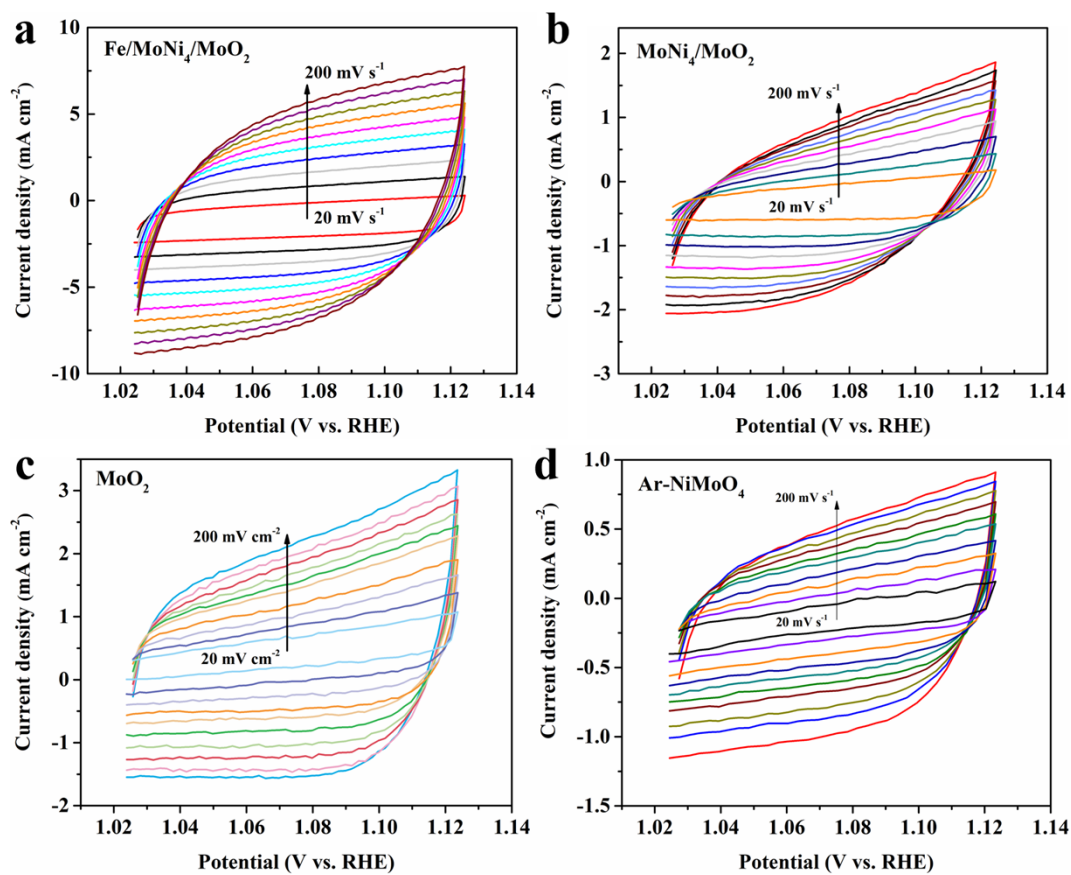

**Supplementary Fig. 19.** Cyclic voltammograms of (a) Fe/MoNi<sub>4</sub>/MoO<sub>2</sub>, (b) MoNi<sub>4</sub>/MoO<sub>2</sub>, (c) MoO<sub>2</sub> and (d) Ar-NiMoO<sub>4</sub> catalysts at various scan rates from 20 to 200 mV s<sup>-1</sup>.

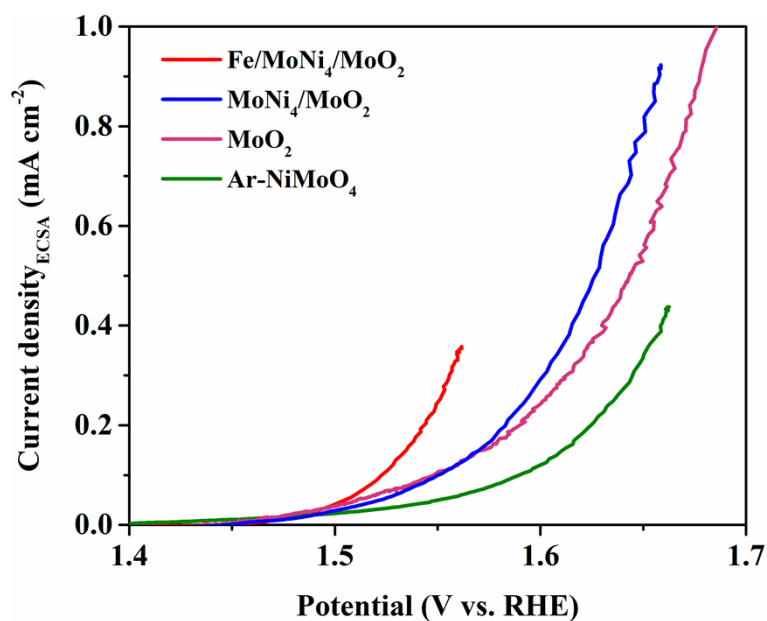

**Supplementary Fig. 20.** The ECSA-normalized OER polarization curves of Fe/MoNi<sub>4</sub>/MoO<sub>2</sub>, MoNi<sub>4</sub>/MoO<sub>2</sub>, MoO<sub>2</sub> and Ar-NiMoO<sub>4</sub> electrodes.

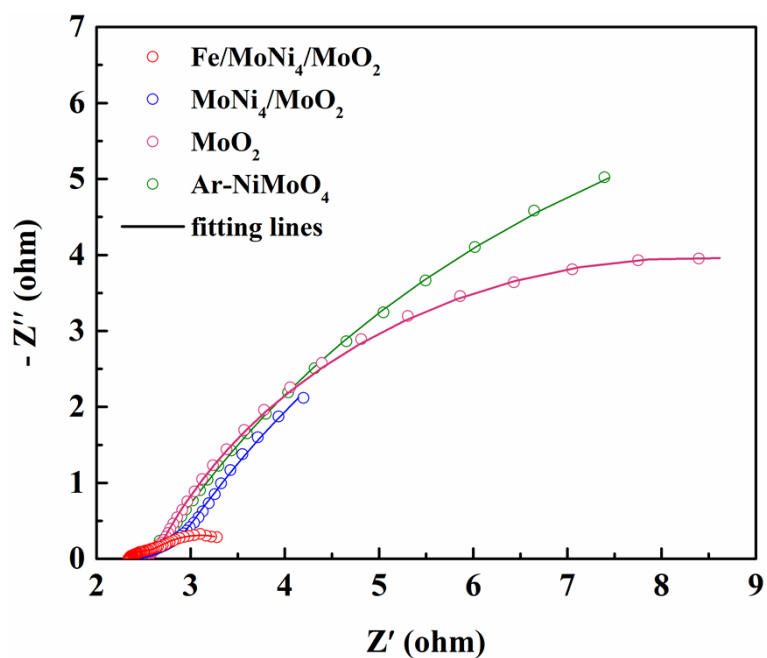

**Supplementary Fig. 21.** The Nyquist plots of Fe/MoNi<sub>4</sub>/MoO<sub>2</sub>, MoNi<sub>4</sub>/MoO<sub>2</sub>, MoO<sub>2</sub> and Ar-NiMoO<sub>4</sub> catalysts in 1 M KOH at 1.53 V.

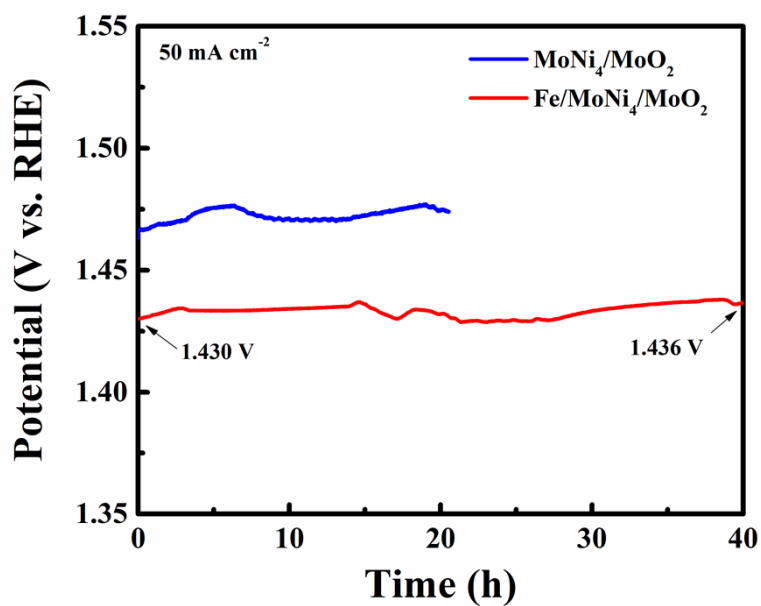

**Supplementary Fig. 22.** Long-term stability tests of Fe/MoNi<sub>4</sub>/MoO<sub>2</sub> and MoNi<sub>4</sub>/MoO<sub>2</sub> catalysts for OER at current density of 50 mA cm<sup>-2</sup> in 1 M KOH.

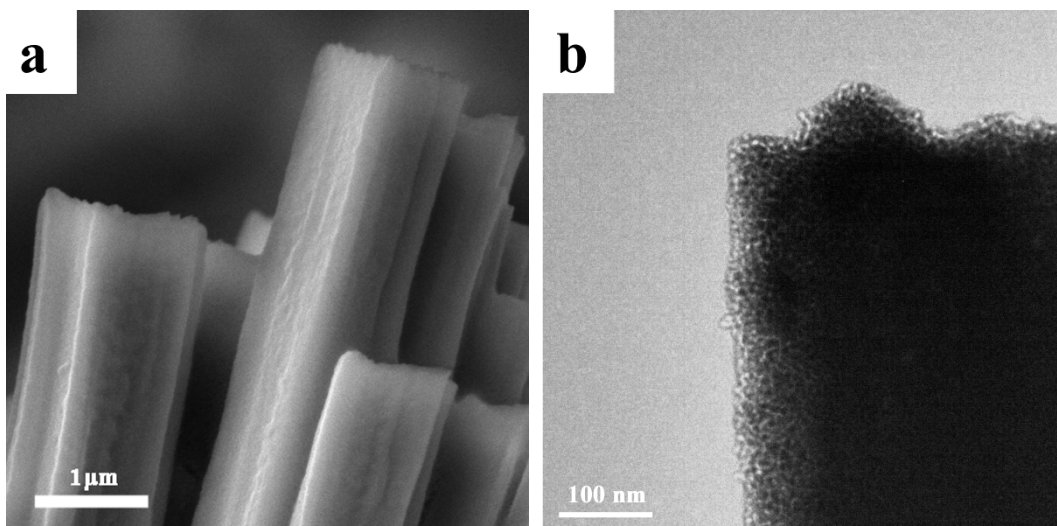

**Supplementary Fig. 23.** (a) SEM image and (b) TEM image of post-OER Fe/MoNi<sub>4</sub>/MoO<sub>2</sub>.

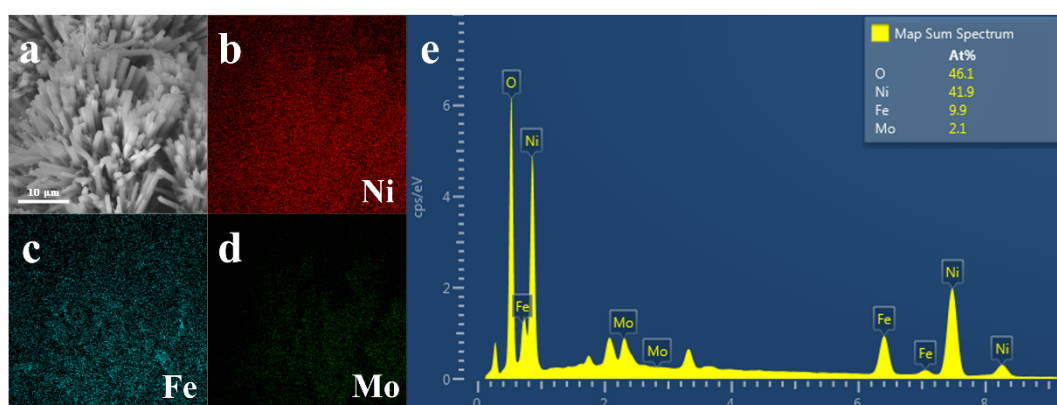

**Supplementary Fig. 24.** (A) SEM image of post-OER Fe/MoNi<sub>4</sub>/MoO<sub>2</sub> and corresponding EDS mapping of (b) Ni, (c) Fe and (d) Mo elements. (e) A typical EDX spectrum for Fe/MoNi<sub>4</sub>/MoO<sub>2</sub> sample after OER and the atomic ratios of O, Ni, Mo and Fe elements were shown in the inset.

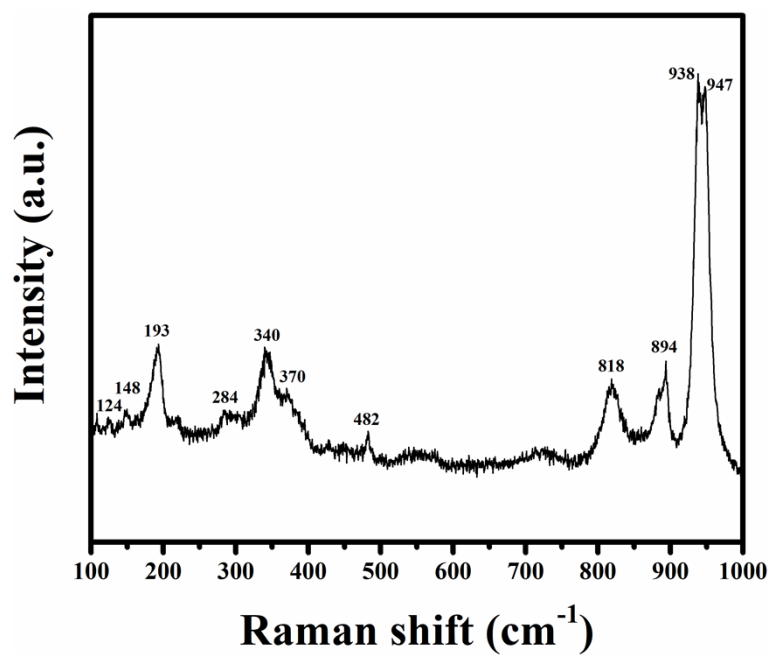

**Supplementary Fig. 25.** Raman spectra of initial Fe/MoNi<sub>4</sub>/MoO<sub>2</sub> sample.

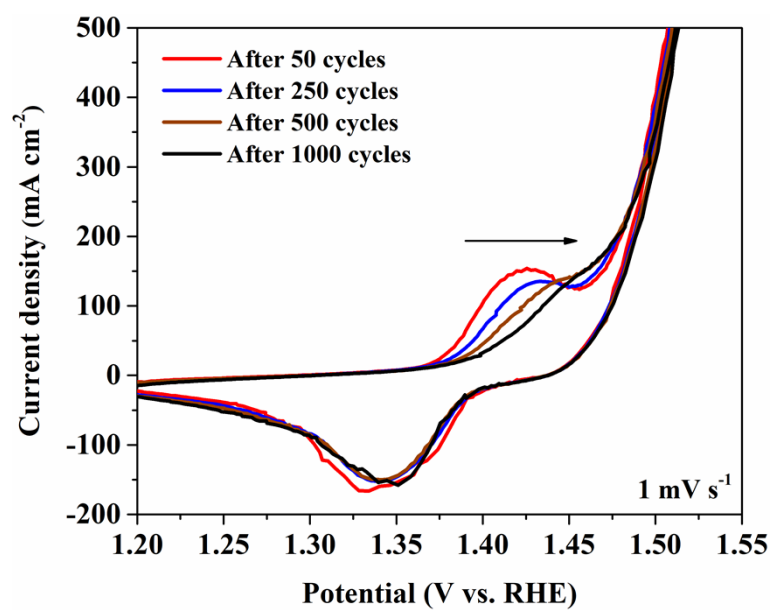

**Supplementary Fig. 26.** The linear polarization curves of Fe/MoNi<sub>4</sub>/MoO<sub>2</sub> collected after different CV cycles.

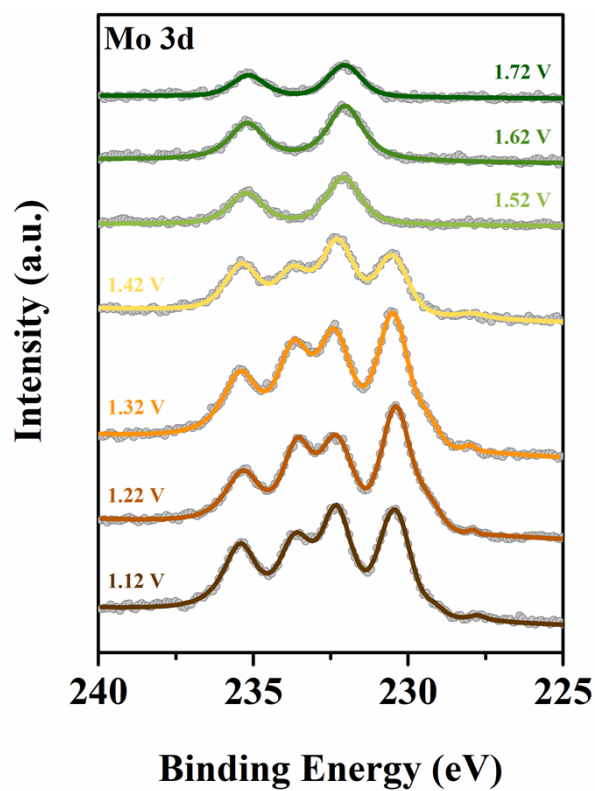

Supplementary Fig. 27. *In-situ* XPS spectra of Mo 3d for Fe/MoNi<sub>4</sub>/MoO<sub>2</sub> during OER.

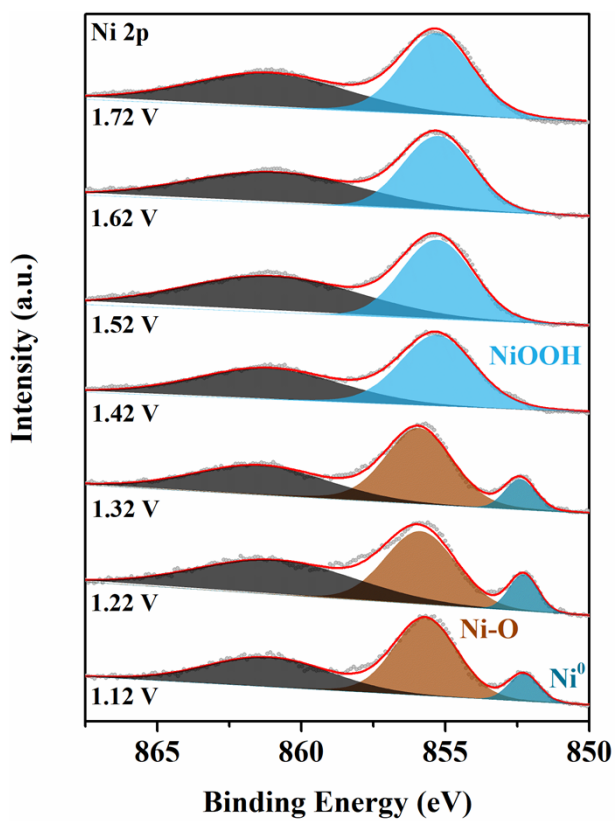

Supplementary Fig. 28. *In-situ* XPS spectra of Ni 2p for MoNi<sub>4</sub>/MoO<sub>2</sub> during OER.

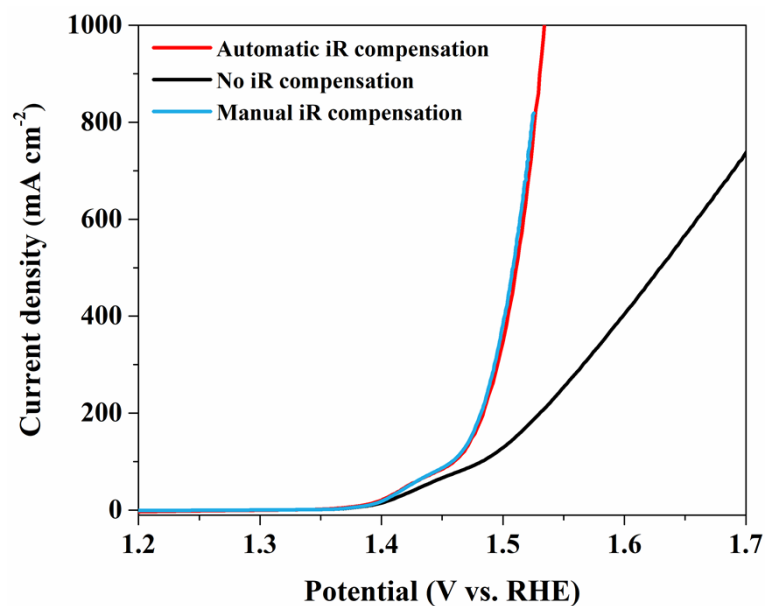

**Supplementary Fig. 29.** The overall-water-splitting polarization curves of Fe/MoNi<sub>4</sub>/MoO<sub>2</sub>|| Fe/MoNi<sub>4</sub>/MoO<sub>2</sub> with automatic, manual (100%) *iR* compensation or without compensation.

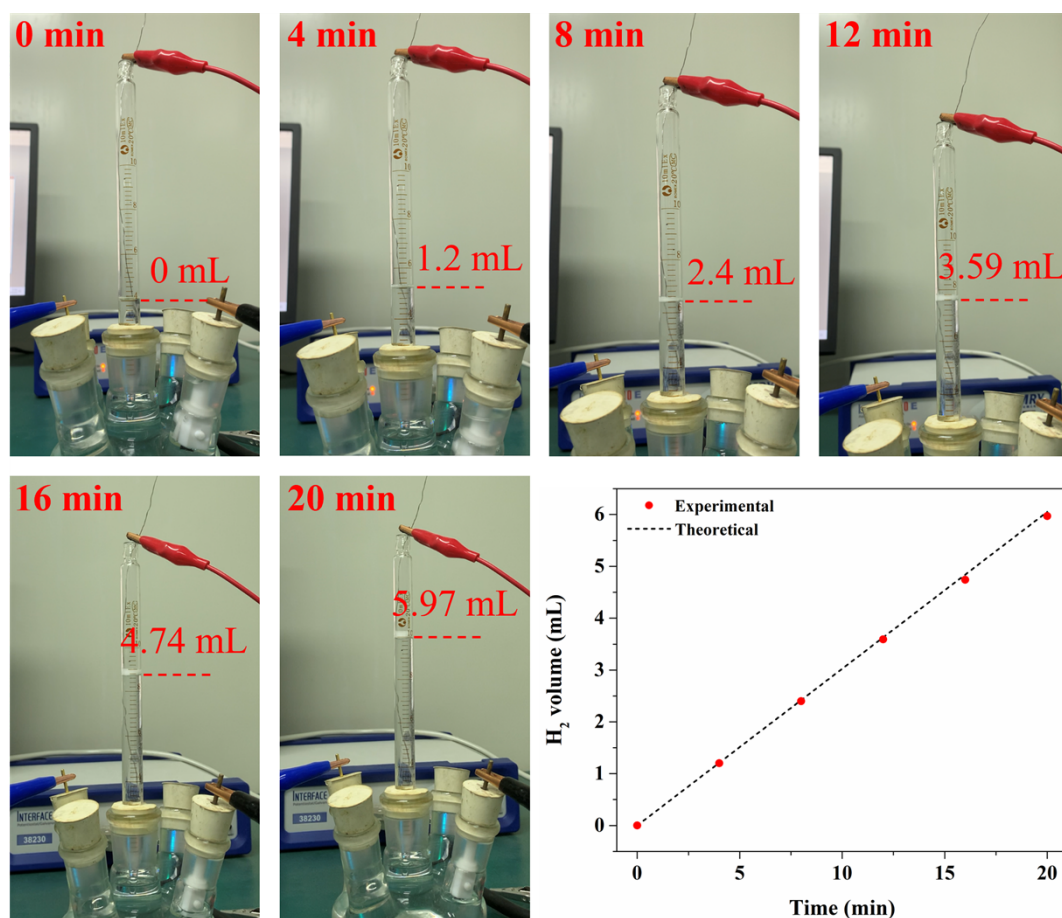

**Supplementary Fig. 30.** Measuring H<sub>2</sub> gas volume and determining the Faradaic efficiency



by comparing experimental (red dot) and theoretical (black line)  $H_2$  amounts using a drainage method during HER catalysis at  $200 \text{ mA cm}^{-2}$  in  $1 \text{ M KOH}$ .

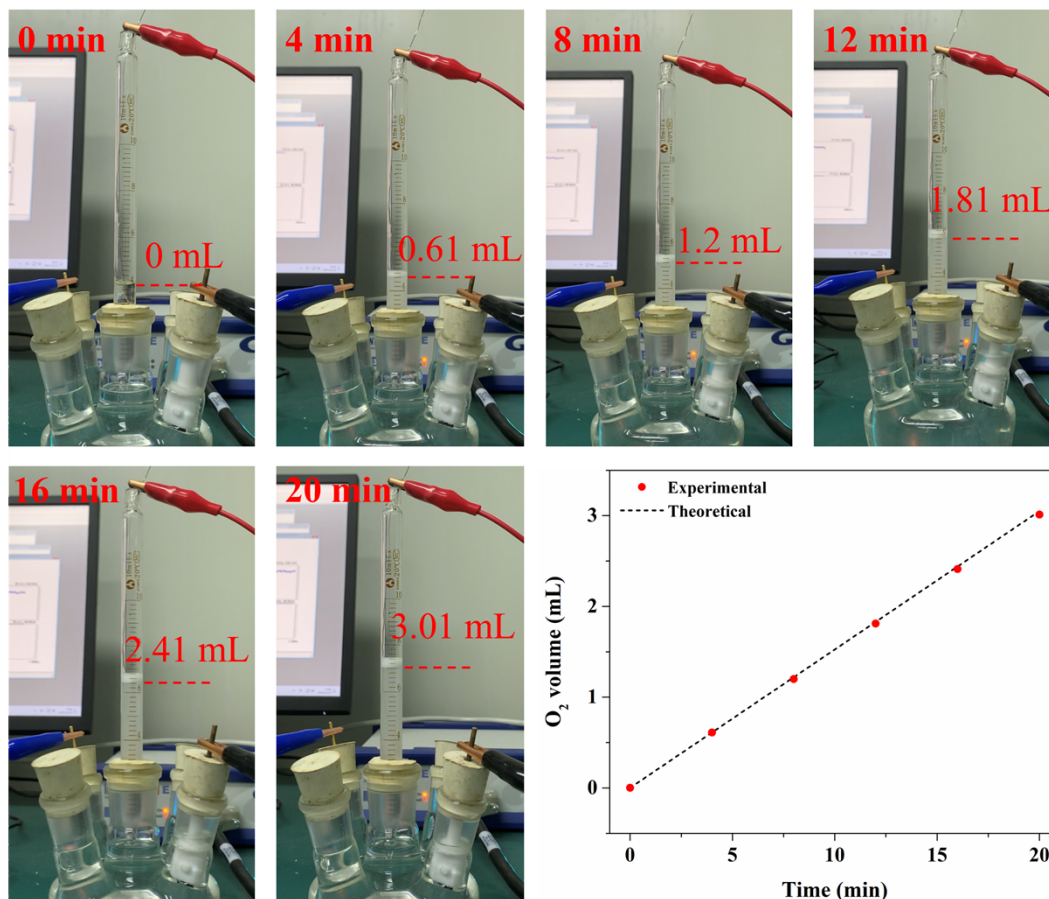

**Supplementary Fig. 31.** Measuring  $O_2$  gas volume and determining the Faradaic efficiency by comparing experimental (red dot) and theoretical (black line)  $O_2$  amounts using a drainage method during OER catalysis at  $200 \text{ mA cm}^{-2}$  in  $1 \text{ M KOH}$ .



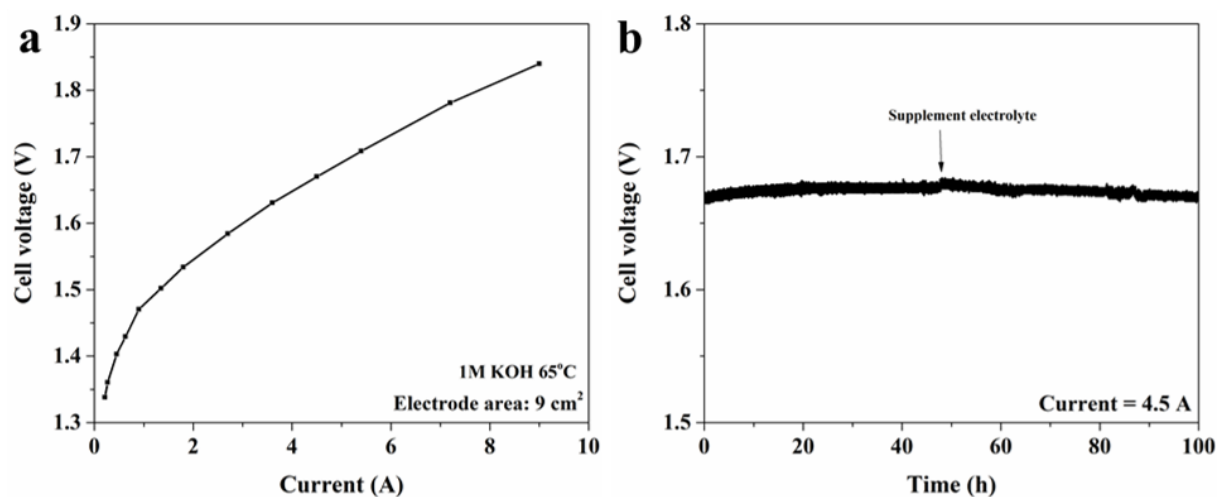

**Supplementary Fig. 32.** (a) The current vs. cell voltage for the anion-exchange-membrane water electrolyzer in 1 M KOH at 65 °C. (b) Long-term stability test under a constant current of 4.5 A in 1 M KOH at 65 °C.

**Supplementary Table 1.** The HER activity comparison between our work and other non-noble electrocatalysts in 1 M KOH.  $\eta_{100}$  and  $\eta_{500}$  mean the overpotentials at 100 and 500 mA  $\text{cm}^{-2}$ , respectively.

| Electrocatalyst                                              | $\eta_{100}$ (mV) | $\eta_{500}$ (mV) | Reference                                                    |
|--------------------------------------------------------------|-------------------|-------------------|--------------------------------------------------------------|
| Fe/MoNi <sub>4</sub> /MoO <sub>2</sub>                       | 23                | 59                | This work                                                    |
| MoNi <sub>4</sub> /MoO <sub>2</sub>                          | 25                | 60                | This work                                                    |
| NiMoO <sub>x</sub> /NiMoS                                    | 89                | 174               | <i>Nat. Commun.</i> <b>2020</b> , <i>11</i> , 5462           |
| Fe,P-NiSe <sub>2</sub>                                       | 83                | 141               | <i>Adv. Mater.</i> <b>2021</b> , <i>33</i> , 2101425         |
| FeNi-LDH/CoP                                                 | 183*              | 265*              | <i>Angew. Chem. Int. Ed.</i> <b>2019</b> , <i>58</i> , 11903 |
| CoP-MNA                                                      | 121               | 196*              | <i>Adv. Funct. Mater.</i> <b>2015</b> , <i>25</i> , 7337     |
| Fe <sub>0.01</sub> -Ni&Ni <sub>0.2</sub> Mo <sub>0.8</sub> N | 59                | 135               | <i>Energy Environ. Sci.</i> <b>2022</b> , <i>15</i> , 3945   |
| Cu@NiFe LDH                                                  | 192               | -                 | <i>Energy Environ. Sci.</i> <b>2017</b> , <i>10</i> , 1820   |

|                                         |      |      |                                                    |
|-----------------------------------------|------|------|----------------------------------------------------|
| Fe-CoP                                  | 162* | 311* | <i>Adv. Mater.</i> <b>2017</b> , 29, 1602441       |
| Ni <sub>3</sub> N@C                     | 95*  | 222* | <i>J. Mater. Chem. A</i> <b>2021</b> , 9, 13562    |
| NiMoN@NiFeN                             | 84   | 180  | <i>Nat. Commun.</i> <b>2019</b> , 10, 5106         |
| Ni <sub>3</sub> N/Co <sub>3</sub> N/CoP | 74   | 115  | <i>Small</i> <b>2024</b> , 20, 2311289             |
| Co <sub>3</sub> Mo/Cu                   | 65*  | 111* | <i>Nat. Commun.</i> <b>2020</b> , 11, 2940         |
| NiMo/MoO <sub>x</sub>                   | 116* | 254* | <i>Adv. Energy Mater.</i> <b>2019</b> , 9, 1901454 |

“\*” means the data was estimated from the literatures.

**Supplementary Table 2.** The fitted results of the EIS Nyquist plots for Fe/MoNi<sub>4</sub>/MoO<sub>2</sub>, MoNi<sub>4</sub>/MoO<sub>2</sub>, FeMo/MoO<sub>2</sub>, MoO<sub>2</sub> and Ar-NiMoO<sub>4</sub> catalysts.

| At -0.05 V            | Fe/MoNi <sub>4</sub> /MoO <sub>2</sub> | MoNi <sub>4</sub> /MoO <sub>2</sub> | FeMo/MoO <sub>2</sub> | MoO <sub>2</sub>      | Ar-NiMoO <sub>4</sub> |
|-----------------------|----------------------------------------|-------------------------------------|-----------------------|-----------------------|-----------------------|
| $R_s$ ( $\Omega$ )    | 2.3                                    | 2.2                                 | 2.9                   | 2.2                   | 4.0                   |
| $R_{ct}$ ( $\Omega$ ) | 1.5                                    | 1.8                                 | 14.8                  | 5.9                   | 4.8                   |
| At 1.53 V             | Fe/MoNi <sub>4</sub> /MoO <sub>2</sub> | MoNi <sub>4</sub> /MoO <sub>2</sub> | MoO <sub>2</sub>      | Ar-NiMoO <sub>4</sub> |                       |
| $R_s$ ( $\Omega$ )    | 2.3                                    | 2.4                                 | 2.5                   | 2.5                   |                       |
| $R_{ct}$ ( $\Omega$ ) | 0.2                                    | 0.4                                 | 11.5                  | 20.7                  |                       |

**Supplementary Table 3.** Adsorption free energies of H and H<sub>2</sub>O on MoNi<sub>4</sub>, Fe/MoNi<sub>4</sub>, Fe/MoO<sub>2</sub> and MoO<sub>2</sub> catalysts.

| Models                 | MoNi <sub>4</sub> | Fe/MoNi <sub>4</sub> | MoO <sub>2</sub> | Fe/MoO <sub>2</sub> |
|------------------------|-------------------|----------------------|------------------|---------------------|
| $\Delta G_H$ (eV)      | -0.70             | -0.11                | -1.03            | -0.77               |
| $\Delta G_{H_2O}$ (eV) | -1.66             | -0.18                | -0.93            | -0.55               |

**Supplementary Table 4.** The OER activity comparison between our work and other non-noble electrocatalysts in 1 M KOH.  $\eta_{500}$  corresponds to the overpotentials at 500 mA cm<sup>-2</sup> and

$j_{300}$  means the current density at the overpotential of 300 mV.

| Electrocatalyst                                       | $\eta_{500}$ (mV) | $j_{300}$ (mA cm <sup>-2</sup> ) | Reference                                                    |
|-------------------------------------------------------|-------------------|----------------------------------|--------------------------------------------------------------|
| Fe/MoNi <sub>4</sub> /MoO <sub>2</sub>                | 277               | 1044                             | This work                                                    |
| MoNi <sub>4</sub> /MoO <sub>2</sub>                   | 370               | 191                              | This work                                                    |
| NiMoO <sub>x</sub> /NiMoS                             | 278               | 682*                             | <i>Nat. Commun.</i> <b>2020</b> , <i>11</i> , 5462           |
| Fe <sub>3</sub> P-NiSe <sub>2</sub>                   | 317               | 289*                             | <i>Adv. Mater.</i> <b>2021</b> , <i>33</i> , 2101425         |
| Ni <sub>2</sub> P-Fe <sub>2</sub> P                   | 322*              | 346*                             | <i>Adv. Funct. Mater.</i> <b>2021</b> , <i>31</i> , 2006484  |
| Ni <sub>x</sub> Fe <sub>1-x</sub> Se <sub>2</sub> -DO | 283*              | 615*                             | <i>Nat. Commun.</i> <b>2016</b> , <i>7</i> , 12324           |
| NiMoN/NiFe LDH                                        | 236               | 1467*                            | <i>Nat. Commun.</i> <b>2023</b> , <i>14</i> , 1873           |
| Cu@NiFe LDH                                           | 312*              | 210*                             | <i>Energy Environ. Sci.</i> <b>2017</b> , <i>10</i> , 1820   |
| NiMoN@NiFeN                                           | 337               | 207*                             | <i>Nat. Commun.</i> <b>2019</b> , <i>10</i> , 5106           |
| Co <sub>3</sub> Mo/Cu                                 | 414*              | 43*                              | <i>Nat. Commun.</i> <b>2020</b> , <i>11</i> , 2940           |
| NiOOH@FeOOH                                           | 292               | 643*                             | <i>Adv. Mater.</i> <b>2022</b> , <i>34</i> , 2108619         |
| NiOOH/(LDH/ $\alpha$ -FeOOH)                          | 366*              | 255*                             | <i>Adv. Mater.</i> <b>2023</b> , <i>35</i> , 2209338         |
| NiFe-LDH/NiFe <sub>2</sub> O <sub>4</sub>             | -                 | 55*                              | <i>Angew. Chem. Int. Ed.</i> <b>2021</b> , <i>60</i> , 26829 |
| FeNiOOH(Se)                                           | 350*              | 175*                             | <i>J. Am. Chem. Soc.</i> <b>2019</b> , <i>141</i> , 7005     |

“ \* ” means the data was estimated from the literature.

**Supplementary Table 5.** The overall water splitting performance of different water electrolyzers made of non-noble electrocatalysts. The cell voltages at 100 and 500 mA cm<sup>-2</sup> are denoted as  $V_{100}$  and  $V_{500}$ .

| Electrocatalysts | $V_{100}$ (V) | $V_{500}$ (V) | Reference |
|------------------|---------------|---------------|-----------|
|------------------|---------------|---------------|-----------|

|                                                                               |        |        |                                                                  |
|-------------------------------------------------------------------------------|--------|--------|------------------------------------------------------------------|
| Fe/MoNi <sub>4</sub> /MoO <sub>2</sub> <sup>(+/-)</sup>                       | 1.508  | 1.586  | This work                                                        |
| MoNi <sub>4</sub> /MoO <sub>2</sub> <sup>(+/-)</sup>                          | 1.554  | 1.665  | This work                                                        |
| NiMoO <sub>x</sub> /NiMoS <sup>(+/-)</sup>                                    | 1.62   | 1.75   | <i>Nat. Commun.</i> <b>2020</b> , <i>11</i> , 5462               |
| Fe,P-NiSe <sub>2</sub> <sup>(+/-)</sup>                                       | 1.599  | 1.733  | <i>Adv. Mater.</i> <b>2021</b> , <i>33</i> , 2101425             |
| Ni <sub>2</sub> P-Fe <sub>2</sub> P <sup>(+/-)</sup>                          | 1.682  | 1.865  | <i>Adv. Funct. Mater.</i> <b>2021</b> , <i>31</i> , 2006484      |
| NiMoN/NiFe LDH <sup>(+/-)</sup>                                               | 1.538* | 1.7    | <i>Nat. Commun.</i> <b>2023</b> , <i>14</i> ,1873                |
| EO-Co <sub>3</sub> Mo <sup>(+)</sup>   Co <sub>3</sub> Mo <sup>(-)</sup>      | 1.62   | 1.825* | <i>Nat. Commun.</i> <b>2020</b> , <i>11</i> , 2940               |
| NiFe LDH@Ni <sub>3</sub> N <sup>(+/-)</sup>                                   | 1.63   | 1.8    | <i>J. Mater. Chem. A</i> <b>2020</b> , <i>8</i> , 17202          |
| Fe <sub>0.01</sub> -Ni&Ni <sub>0.2</sub> Mo <sub>0.8</sub> N <sup>(+/-)</sup> | 1.525  | 1.632  | <i>Energy Environ. Sci.</i> <b>2022</b> , <i>15</i> , 3945       |
| NiFe LDH-NS <sup>(+/-)</sup>                                                  | 1.8*   | 2.02*  | <i>Adv. Mater.</i> <b>2017</b> , <i>29</i> , 1700017             |
| Co-Fe <sub>2</sub> P <sup>(+/-)</sup>                                         | 1.69   | 1.8*   | <i>Appl. Catal. B Environ.</i> <b>2021</b> , <i>297</i> , 120386 |
| MoS <sub>2</sub> /FeCoNiP <sub>x</sub> <sup>(+/-)</sup>                       | 1.59   | 1.78*  | <i>Nat. Commun.</i> <b>2021</b> , <i>12</i> , 1380               |
| Fe <sub>2</sub> P/Co <sub>2</sub> N <sup>(+/-)</sup>                          | 1.561  | 1.663  | <i>Adv. Funct. Mater.</i> <b>2023</b> , <i>33</i> , 2209465      |
| NiFe LDH <sup>(+)</sup>   NiO/Ni-CNT <sup>(-)</sup>                           | 1.584* | 1.936* | <i>Nat. Commun.</i> <b>2014</b> , <i>5</i> , 4695                |

“\*” means the data was estimated from the polarization curves given in the literature.

## Reference

1. W. R. Zheng, *ACS Energy Lett.* **2023**, *8*, 1952.
2. Y. Yang, H. L. Fei, G. D. Ruan, J. M. Tour, *Adv. Mater.* **2015**, *27*, 3175-3180.
3. L. B. Wu, M. H. Ning, X. X. Xing, Y. Wang, F. H. Zhang, G. H. Gao, S. W. Song, D. Z. Wang, C. Q. Yuan, L. Yu, J. M. Bao, S. Chen, and Z. F. Ren, *Adv. Mater.* **2023**, *35*, 2306097.

4. G. Kresse, J. Hafner, *Phys. Rev. B* **1993**, *47*, 558.
5. J. P. Perdew, K. Burke, M. Ernzerhof, *Phys. Rev. Lett.* **1996**, *77*, 3865-3868.
6. S. Grimme, J. Antony, S. Ehrlich, H. Krieg, *J. Chem. Phys.* **2010**, *132*, 154104.
7. G. Henkelman, B. P. Uberuaga, H. Jónsson, *J. Chem. Phys.* **2000**, *113*, 9901-9904.
